# Supplementary material for: Construction of a Prognosis-Related Gene Signature by Weighted Gene Coexpression Network Analysis in Ewing Sarcoma
Source: Hindawi journal article supplement (doi:10.1155/2022/8798624), 2022-01-27

Histogram of k

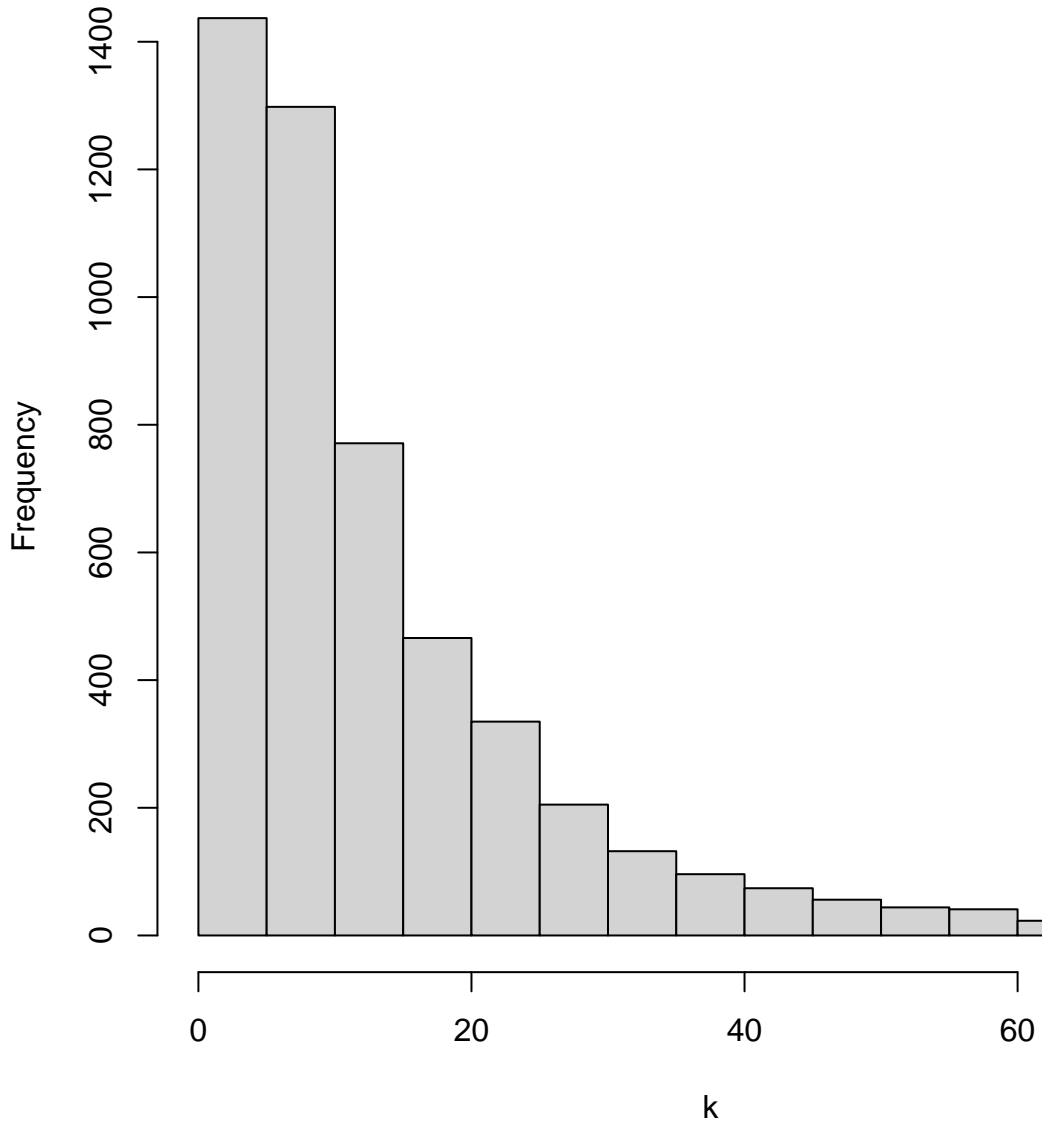

Check scale free topology scale  $R^2= 0.89$  , slope=  $-1.84$

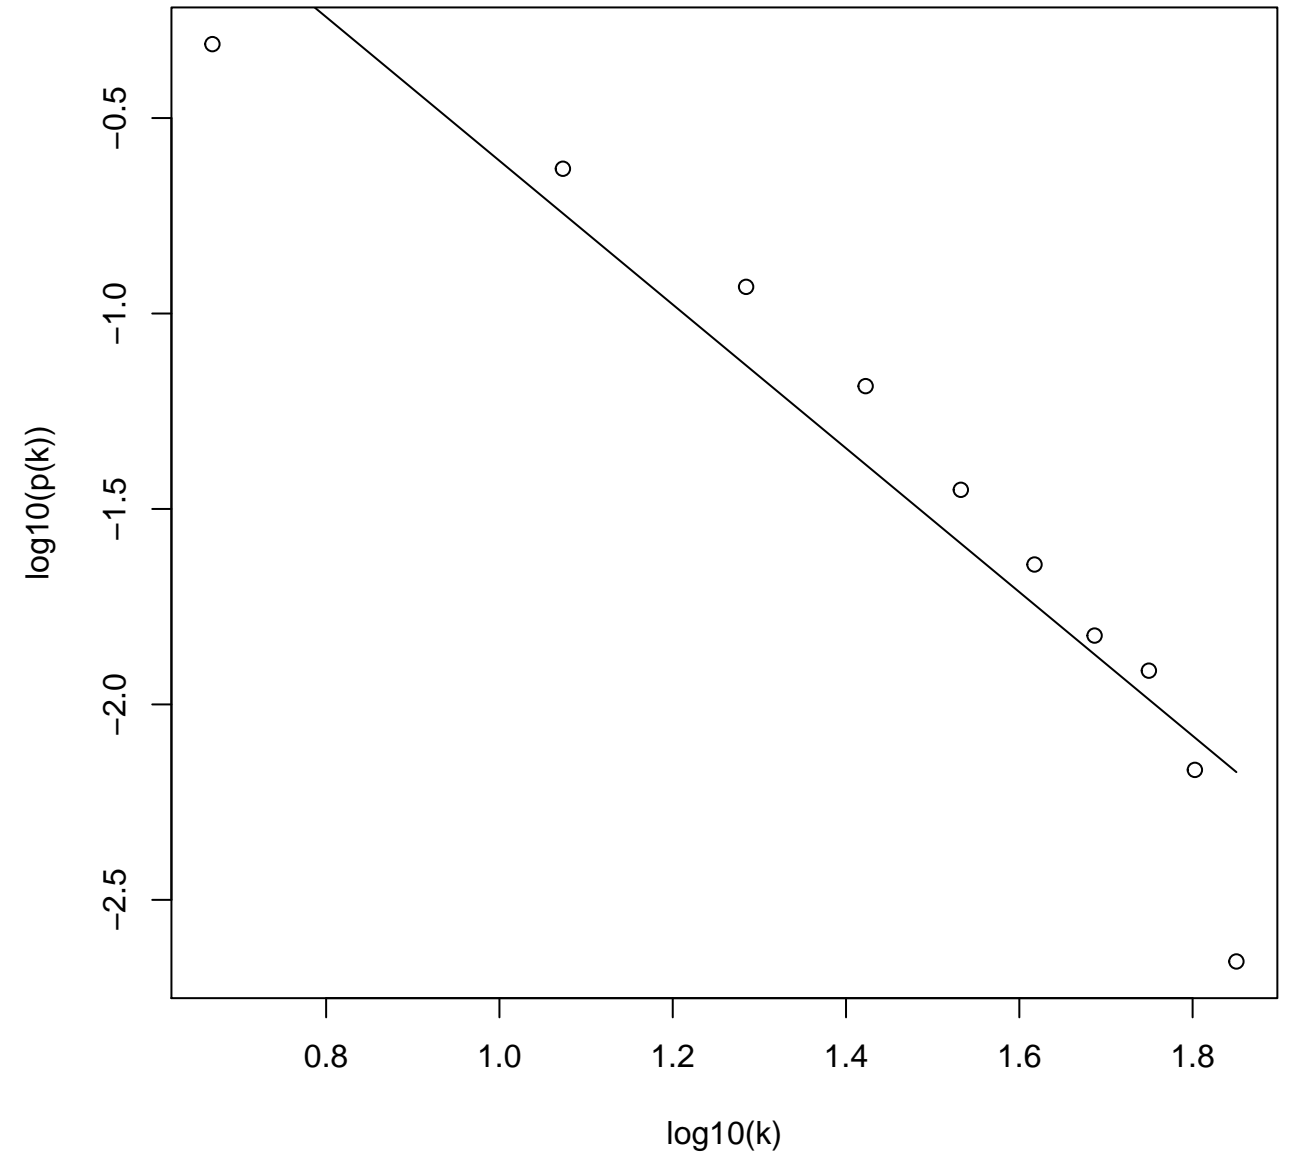

Supplement: f1 [file 8798624.f1.pdf]
