# Supplementary material for: Construction of a Prognosis-Related Gene Signature by Weighted Gene Coexpression Network Analysis in Ewing Sarcoma
Source: Hindawi journal article supplement (doi:10.1155/2022/8798624), 2022-01-27

Network heatmap plot, select 400 genes

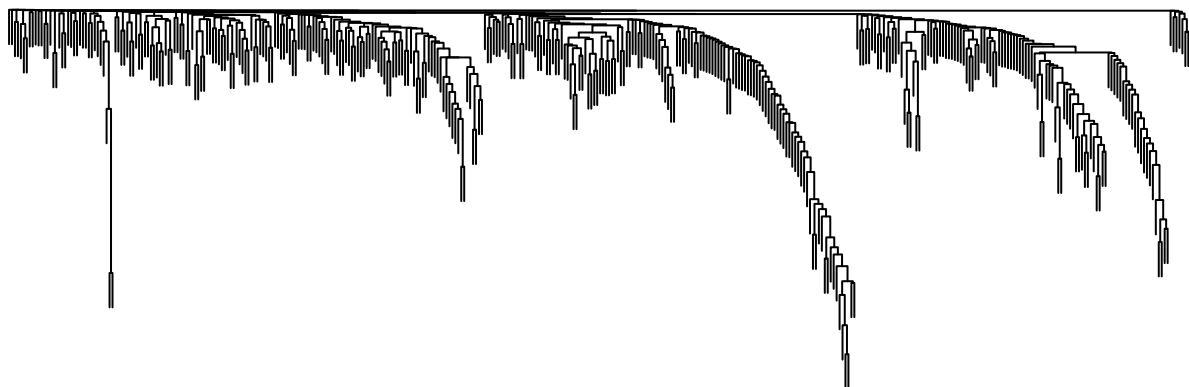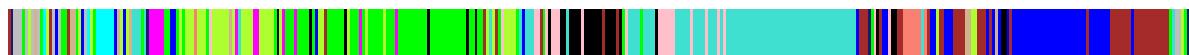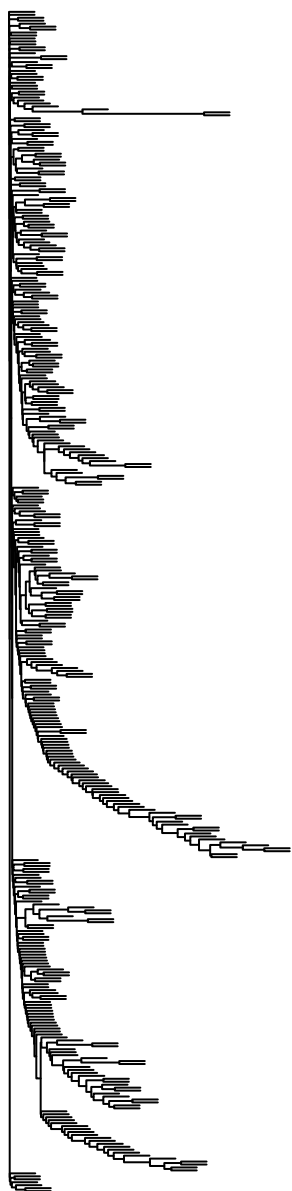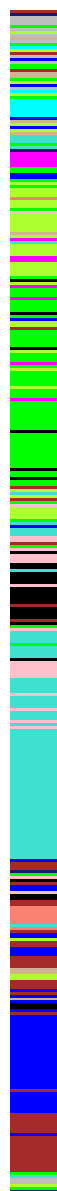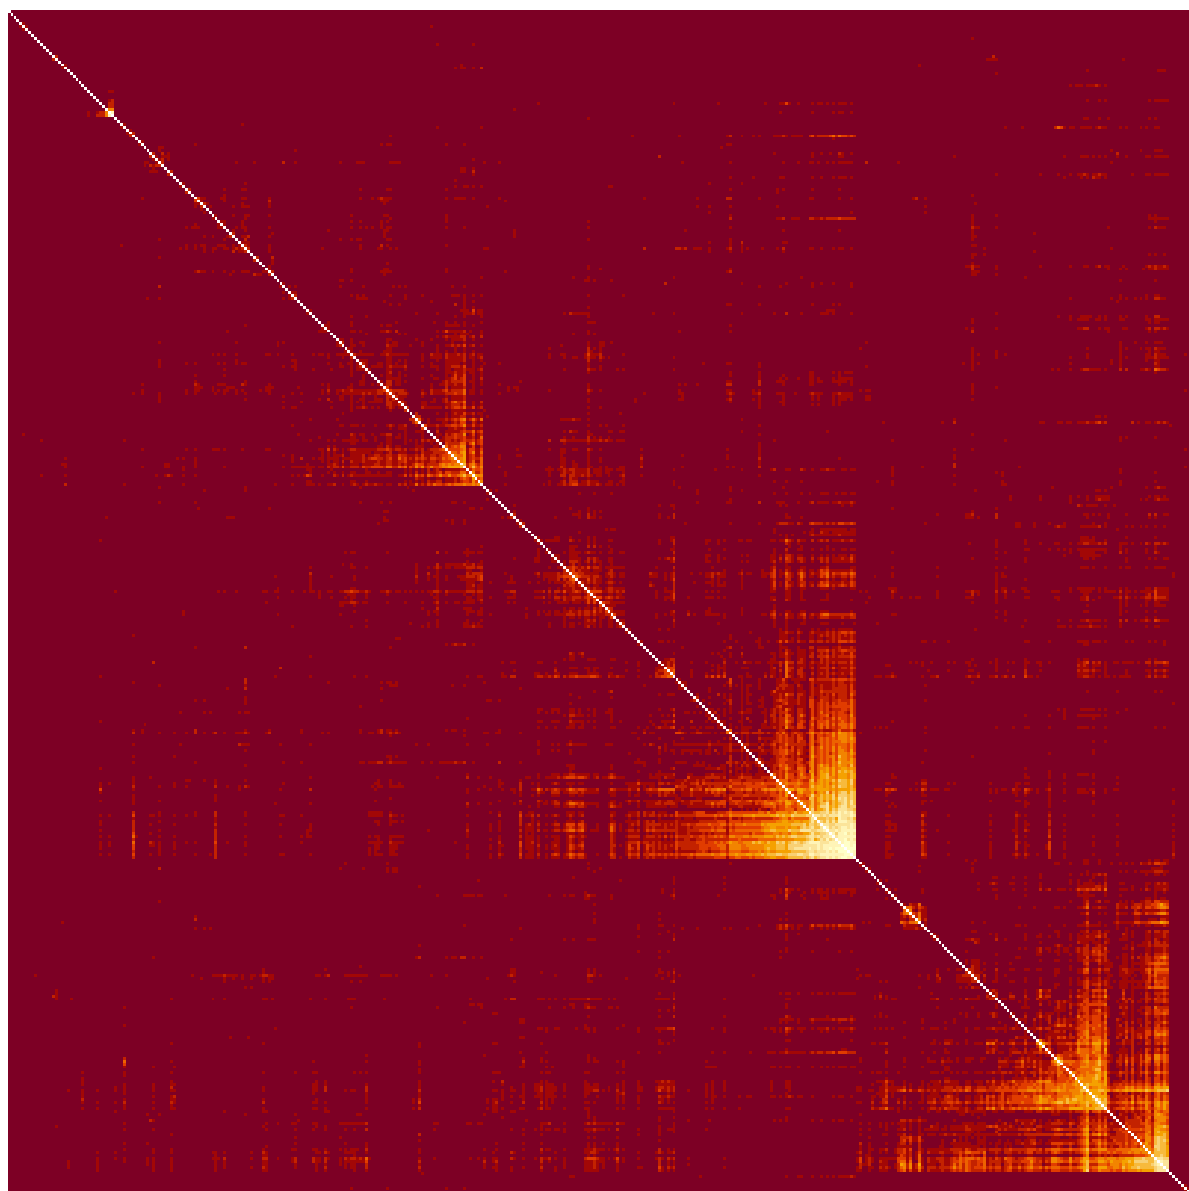

Supplement: f2 [file 8798624.f2.pdf]
